# Supplementary material
Source: Springer Nature journal article supplement (https://www.springermedizin.de/resource/supplementary/13054_2012_619_MOESM7_ESM.pdf/9708790)

(b)

ICP 10MMHG

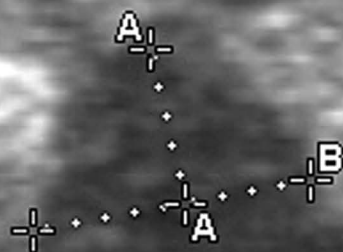

3.3

A 0.30cm

B 0.53cm

Supplement: MOESM7 [file 9708790]
